# Supplementary material for: Validity and Reliability of Questionnaires That Assess Barriers and Facilitators of Sedentary Behavior in the Pediatric Population: A Systematic Review
Source: MDPI journal article supplement (doi:10.3390/ijerph192416834), 2022-12-15
Supplement: s1 [file s1]

**Supplementary Table S1:** Questions about barriers and facilitators of sedentary behavior from the questionnaires evaluated.

| First Author                                                                                        | Questions                               | Answer options                                                                                                                                                                                                                                                                                                                                                                                                                                                                                                                                                                                                                                                                                                                                                                                                                                                                                                                                                                                                                                                                                                                                                                                                                                 |
|-----------------------------------------------------------------------------------------------------|-----------------------------------------|------------------------------------------------------------------------------------------------------------------------------------------------------------------------------------------------------------------------------------------------------------------------------------------------------------------------------------------------------------------------------------------------------------------------------------------------------------------------------------------------------------------------------------------------------------------------------------------------------------------------------------------------------------------------------------------------------------------------------------------------------------------------------------------------------------------------------------------------------------------------------------------------------------------------------------------------------------------------------------------------------------------------------------------------------------------------------------------------------------------------------------------------------------------------------------------------------------------------------------------------|
| <i>Jago et al, 2005 [18]</i>                                                                        | <b>Questionnaire not reported</b>       |                                                                                                                                                                                                                                                                                                                                                                                                                                                                                                                                                                                                                                                                                                                                                                                                                                                                                                                                                                                                                                                                                                                                                                                                                                                |
| <i>Ridley et al, 2006 [21]</i><br>(Multimedia Activity Recall for Children and Adolescents - MARCA) | <b>Questionnaire available</b>          |                                                                                                                                                                                                                                                                                                                                                                                                                                                                                                                                                                                                                                                                                                                                                                                                                                                                                                                                                                                                                                                                                                                                                                                                                                                |
| <i>Jago et al, 2009 [19]</i><br>(Questionnaire Physical Activity Self-Efficacy - PASE)              | How sure are you that you have (can)... | <p>limit watching TV to 1 hour at least one school day?</p> <p>limit watching TV to 1 hour per day for most school days?</p> <p>not watch TV at all for one school day?</p> <p>limit watching TV to 1 hour at least one non-school day, including the weekend?</p> <p>limit watching TV to 1 hour most non-school days, including weekend?</p> <p>not watch TV at all for most school days?</p> <p>not watch TV at all for one non-school day, including the weekend?</p> <p>not watch TV at all for most non-school days, including weekend?</p> <p>limit playing computer or video games to 1 hour at least one school day?</p> <p>not play computer or video games at all for one school day?</p> <p>limit playing computer or video games to 1 hour for most school days?</p> <p>limit playing computer or video games to 1 hour at least 1 non-school day, including the weekend?</p> <p>limit playing computer or video games to 1 hour for most non-school days, including the weekend?</p> <p>not play computer or video games at all for most school days?</p> <p>not play computer or video games at all for one non-school day, including the weekend?</p> <p>not play computer or video games at all for most non-school days,</p> |

|                                                                                                               |                                                                                                                        | <p>including the weekend?</p> <p>limit talking on the telephone to 1 hour at least one school day?</p> <p>limit talking on the telephone to 1 hour for most school days?</p> <p>limit talking on the telephone to 1 hour for most non-school days, including the weekend?</p> <p>limit talking on the telephone to 1 hour at least one non-school day, including the weekend?</p> <p>not talk on the telephone at all for one school day?</p> <p>not talk on the telephone at all for most school days?</p> <p>not talk on the telephone at all for one non-school day, including the weekend?</p> <p>not talk on the telephone at all for most non-school days, including weekend?</p> |
|---------------------------------------------------------------------------------------------------------------|------------------------------------------------------------------------------------------------------------------------|-----------------------------------------------------------------------------------------------------------------------------------------------------------------------------------------------------------------------------------------------------------------------------------------------------------------------------------------------------------------------------------------------------------------------------------------------------------------------------------------------------------------------------------------------------------------------------------------------------------------------------------------------------------------------------------------|
| Author                                                                                                        | Questions                                                                                                              | Scale the Likert                                                                                                                                                                                                                                                                                                                                                                                                                                                                                                                                                                                                                                                                        |
| <p><i>Dwyer et al, 2011 [21]</i><br/>(Preschool-age Children's Physical Activity Questionnaire - Pre-PAQ)</p> | <p>How much do you agree with the following statements?</p>                                                            | <p>I am physically active with or in front of my child</p> <p>I limit what my child does as I worry that he/she may injury themselves</p> <p>I focus upon my child developing their basic learning skills such as numbers and letters.</p> <p>My work schedule or other commitments limit the time I have to play with my child.</p>                                                                                                                                                                                                                                                                                                                                                    |
|                                                                                                               | <p>How well do these statements describe your child?<br/>(Please tick one box and one response for each statement)</p> | <p>My child needs me to</p> <p>motivate him/her to play</p> <p>My child needs company<br/>(e.g., friends, siblings, parents, adults) to</p>                                                                                                                                                                                                                                                                                                                                                                                                                                                                                                                                             |
| Author                                                                                                        | Questions                                                                                                              | Answer options                                                                                                                                                                                                                                                                                                                                                                                                                                                                                                                                                                                                                                                                          |

|                                                                       |                                                       |                                                                                                                                                                                      |
|-----------------------------------------------------------------------|-------------------------------------------------------|--------------------------------------------------------------------------------------------------------------------------------------------------------------------------------------|
| <i>Vaughn et al. 2013 [16]</i><br>(Quesitonnaire's name not reported) | <b>Controlling Practices around Physical Activity</b> | <b>No access to answer options</b>                                                                                                                                                   |
|                                                                       | Rules around active play indoors                      | How often is your child allowed to do each of the following activities while playing inside your house...<br>...climbing<br>...hopping, skipping or galloping                        |
|                                                                       | Rules around active play outdoors                     | How often do you ask your child...<br>...to calm down his/her outdoor play?<br>...not to run while s/he is playing outside?                                                          |
|                                                                       | Use of PA to reward/control behavior                  | How often does your child get extra outside time as a reward?<br>How often do you offer sports or physical activities to your child as a reward for good behavior?                   |
|                                                                       | <b>Controlling Practices around Screen Time</b>       | <b>No access to answer options</b>                                                                                                                                                   |
|                                                                       | Explicit modeling and enjoyment of PA                 | ...hear you talk about participating in a sport or being physically active?<br>...see you doing, or going to do, something that is physically active?                                |
|                                                                       | Verbal encouragement for PA                           | During a typical week, how often do you...<br>...say things to encourage your child to spend less time being sedentary?<br>...tell your child how sedentary habits can be unhealthy? |
|                                                                       | Logistic support for sports                           | How active are you in enrolling your child in sports?<br>For how many activities have you or other adult paid fees?                                                                  |
|                                                                       | Logistic support for active play                      | During a typical week, how often do you take your child to the park to play?<br>During the last month, how many times have you taken your child to play at a park?                   |
|                                                                       | Importance and value of PA                            | How important is it for your child to be physically active when s/he grows up?<br>How valuable is it to you that your child be physically active?                                    |
|                                                                       | Support/reinforcement from other adults               | Other adults in my child's life make it hard to...<br>...get my child to be physically active.<br>...enforce household rules about TV viewing.                                       |
|                                                                       | Limiting or monitoring screen time                    | About how much time is s/he allowed to watch TV, videos, or movies each weekday/ weekend day?                                                                                        |

|                                                                                       | Use of screen time to reward/control behavior  | <p>How often do you...</p> <p>...use TV time to control your child's behavior?</p> <p>...take away TV, video, or movie time as a punishment for bad behavior?</p> <p>During a typical week, how often do you watch TV or videos with your child?</p> <p>I enjoy watching TV/movies with my child.</p>                                                                                                                                                                                                                                                                                                             |
|---------------------------------------------------------------------------------------|------------------------------------------------|-------------------------------------------------------------------------------------------------------------------------------------------------------------------------------------------------------------------------------------------------------------------------------------------------------------------------------------------------------------------------------------------------------------------------------------------------------------------------------------------------------------------------------------------------------------------------------------------------------------------|
|                                                                                       | Exposure to TV                                 | <p>How many days per week does your family have the television on during...</p> <p>...breakfast?</p> <p>...the evening meal?</p>                                                                                                                                                                                                                                                                                                                                                                                                                                                                                  |
|                                                                                       | Explicit modeling and enjoyment of screen time | <p>During a typical week, how often do you watch TV or videos with your child?</p> <p>I enjoy watching TV/movies with my child.</p>                                                                                                                                                                                                                                                                                                                                                                                                                                                                               |
|                                                                                       | Limiting outdoor play due to weather           | <p>How often do you let your child play outside...</p> <p>...on cold days?</p> <p>...on hot days?</p>                                                                                                                                                                                                                                                                                                                                                                                                                                                                                                             |
| Author                                                                                | Questions                                      | Multiple Answer                                                                                                                                                                                                                                                                                                                                                                                                                                                                                                                                                                                                   |
| <i>Norman et al, 2018 [20]</i><br>(Eating and Physical Activity Questionnaire - EPAQ) | Items (How certain are you that you can . . .) | <p>Get your child to be physically active outdoors several times a week for example by structured play?</p> <p>Get your child to participate in organized physical activity at least once a week, for example by dancing, swimming, or playing soccer?</p> <p>Get your child to be physically active (e.g., playing outdoors) instead of watching TV or playing computer games?</p> <p>Walk with your child to and from school several times a week?</p> <p>Be a good role model by being physically active yourself several times a week, for example, by participating in sports, swimming, or bike riding?</p> |
|                                                                                       | Items (How certain are you that you can . . .) | <p>Limit your child to watch TV, DVDs, or play on the computer, smartphone or tablet 2 hours a day at the most?</p>                                                                                                                                                                                                                                                                                                                                                                                                                                                                                               |
| Author                                                                                | Questions                                      | Scale the Likert                                                                                                                                                                                                                                                                                                                                                                                                                                                                                                                                                                                                  |
| Dwyer et al, 2011                                                                     | How much do you agree with the following       | Encourage my child to play outside when                                                                                                                                                                                                                                                                                                                                                                                                                                                                                                                                                                           |

|                                |                                                                                                                                                                                             |                                                                                                                                                                                                                                                                                                                                                                                                                                                                                                                                                                                                                                                                                                                                                                                                                                                                                                                                                           |
|--------------------------------|---------------------------------------------------------------------------------------------------------------------------------------------------------------------------------------------|-----------------------------------------------------------------------------------------------------------------------------------------------------------------------------------------------------------------------------------------------------------------------------------------------------------------------------------------------------------------------------------------------------------------------------------------------------------------------------------------------------------------------------------------------------------------------------------------------------------------------------------------------------------------------------------------------------------------------------------------------------------------------------------------------------------------------------------------------------------------------------------------------------------------------------------------------------------|
| (Pre-PAQ)<br><br>Questionnaire | statements?                                                                                                                                                                                 | the weather is suitable                                                                                                                                                                                                                                                                                                                                                                                                                                                                                                                                                                                                                                                                                                                                                                                                                                                                                                                                   |
|                                | How well do these statements describe your child?<br>(Please tick one box and one response for each statement)                                                                              | It is safe for my child to play outdoors in my neighborhood (if supervised)<br><br>There are usable footpaths on most of the streets in my local area<br>There are major barriers or dangers to walking with my child in my neighborhood that make it hard to get from place to place (for example, major roads, railway lines, canals, storm water drains or rivers).<br>There is so much traffic along the streets that it makes it difficult or dangerous to walk with my child in my neighborhood<br>There are sufficient traffic lights or pedestrian crossings to make it safe to walk with my child around my neighborhood.<br>The level of crime in my neighborhood makes it unsafe to go on walks with my child during the day<br>The local shop(s) are within easy walking distance of my home<br>There are dangers (e.g. dogs, undesirable people) in the local park(s) so I avoid taking my child there.<br>My child has a very active nature |
|                                | How often does your child use the facilities listed below to play and be physically activity, in a typical month, when the weather is suitable?<br>(please tick as many responses as apply) | Open areas such as beaches, rivers, natural reserves<br><br>Park or oval<br>Public playground<br>Swimming pool (public or private)                                                                                                                                                                                                                                                                                                                                                                                                                                                                                                                                                                                                                                                                                                                                                                                                                        |
|                                | <b>Multiple Answer</b>                                                                                                                                                                      |                                                                                                                                                                                                                                                                                                                                                                                                                                                                                                                                                                                                                                                                                                                                                                                                                                                                                                                                                           |
|                                | What best describes your backyard?<br>(please tick <i>one response</i> )                                                                                                                    | No yard at all<br>No private yard                                                                                                                                                                                                                                                                                                                                                                                                                                                                                                                                                                                                                                                                                                                                                                                                                                                                                                                         |

|                                                                                                                          |                                                                                                                                                                       | A small yard<br>A medium yard (eg. a standard block of land)<br>A large yard (eg. ¼ acre/1000m <sup>2</sup> or more)                                                                                                                                                           |
|--------------------------------------------------------------------------------------------------------------------------|-----------------------------------------------------------------------------------------------------------------------------------------------------------------------|--------------------------------------------------------------------------------------------------------------------------------------------------------------------------------------------------------------------------------------------------------------------------------|
|                                                                                                                          | What was the weather like YESTERDAY?<br>(please tick one response)                                                                                                    | Fine to play outdoors<br>Too wet to play outdoors<br>Too hot or humid to play outdoors<br>Too cold to play outdoors                                                                                                                                                            |
|                                                                                                                          | Does your local neighbourhood have the following places or facilities where your child can be play and be physically active? (please tick as many responses as apply) | Open areas such as beaches, rivers, natural reserves<br>Public park or oval<br>Playground<br>Public swimming pool<br>Gym that offers programs for young children e.g. kindergym, playgym etc.<br>Club that offers activities/sports for young children e.g. soccer, dance etc. |
| Author                                                                                                                   | Questions                                                                                                                                                             | Scale the Likert                                                                                                                                                                                                                                                               |
| <i>Fillon et al. 2022 [22]</i><br>(Physical and Sedentary Activity Questionnaire for Children and Adolescents - CAPAS-Q) | On average, how much time do you spend sitting each day in class, at recess, canteen, etc.                                                                            | Less than 2 hours<br>2 am to 4 am<br>4 am to 6 am<br>6am to 8am<br>8am to 10am<br>More than 10 am                                                                                                                                                                              |
|                                                                                                                          | On average, on weekends or holidays, how much time do you spend day in front of a screen (computer, tablet, phone, video game, TV, etc.)?                             | Less than 2 hours<br>2 am to 4 am<br>4 am to 6 am<br>6am to 8am<br>8am to 10am                                                                                                                                                                                                 |

More than 10 am

On school days, how many times a day  
do you sit for more than 1.5  
hours without moving for at least 2  
minutes straight?

0 times

1 time

2 time

3 time

4 time

more than 4 times
